# Supplementary material
Source: Research Square preprint supplement (doi:10.21203/rs.3.rs-7738675/v1)
Supplement: Supplementary file 1 [file e97e668b3ba0656515f8c7bf.docx]

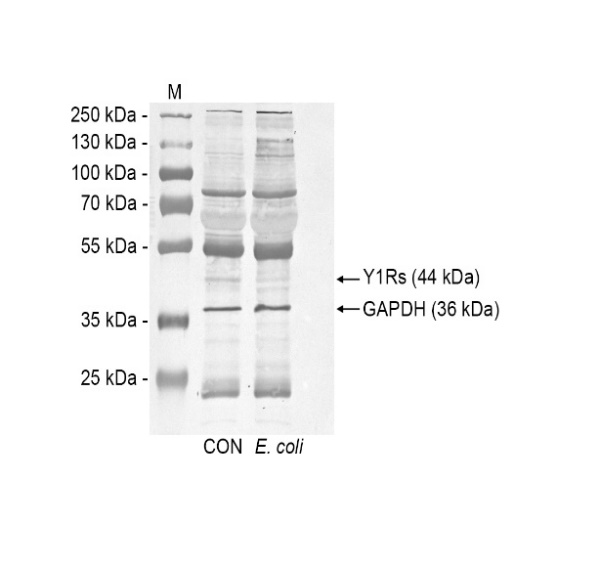

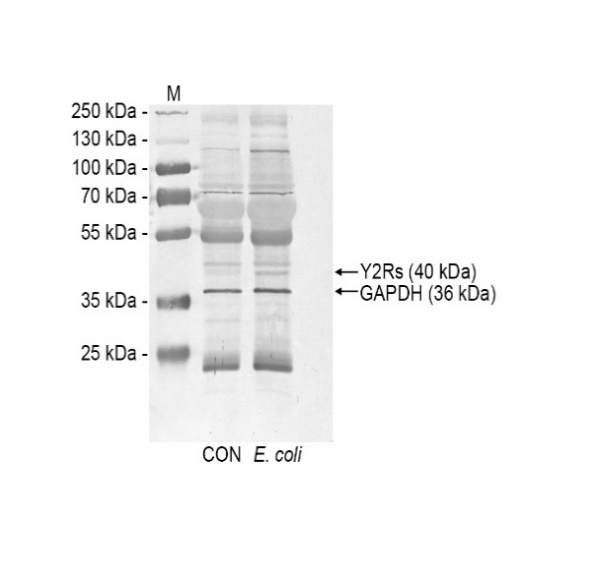


**A**

**B**

**Figure 1.** Representative blots for neuropeptide Y (NPY) receptor subtype 1 (Y1R, A) and NPY receptor subtype 2 (Y2R, B) protein abundancesin the endometrium of gilts from the control (CON) and *E. coli* (*E. coli*) groups, determined by Western blotting. The density of bands was normalized against glyceraldehyde-3-phosphate dehydrogenase (GAPDH) protein used as loading control. Protein bands corresponded to the molecular weight of Y1Rs, Y2Rs and GAPDH - 44, 40 and 36 kDa, respectively. marker: M.


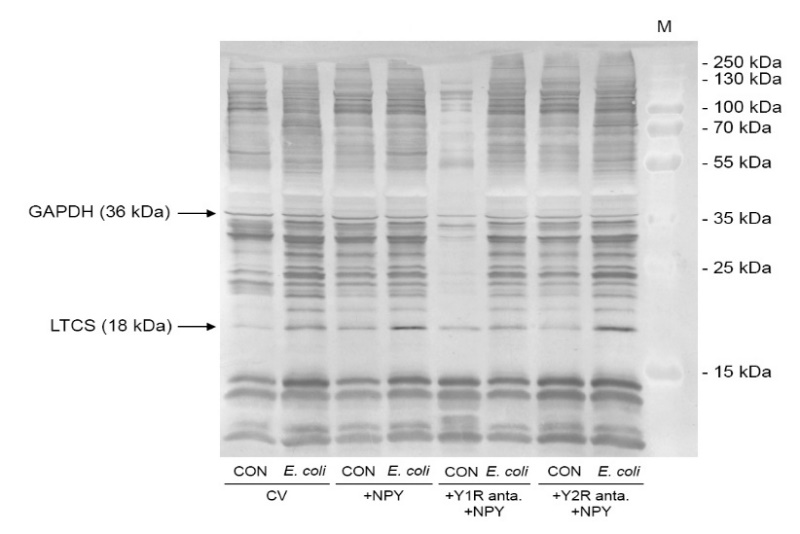

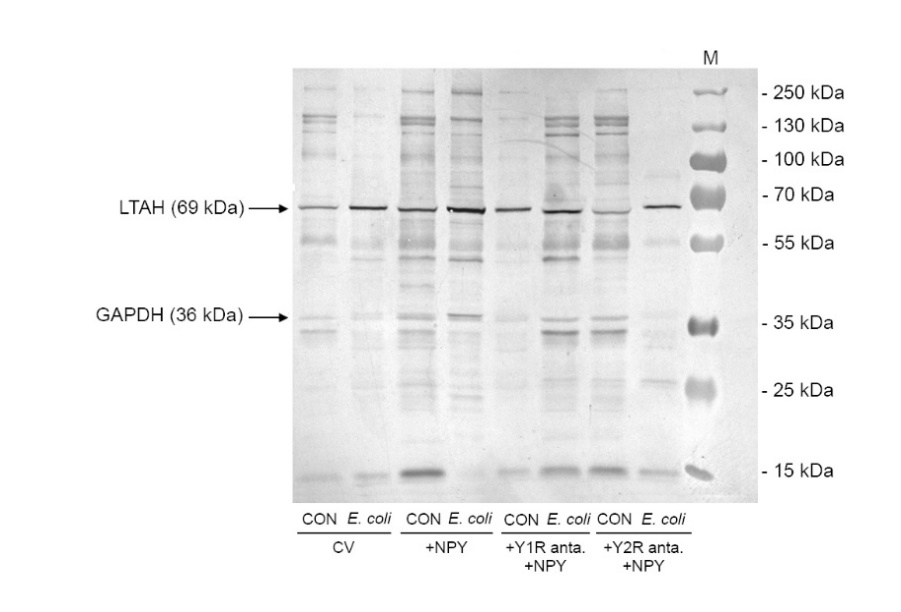

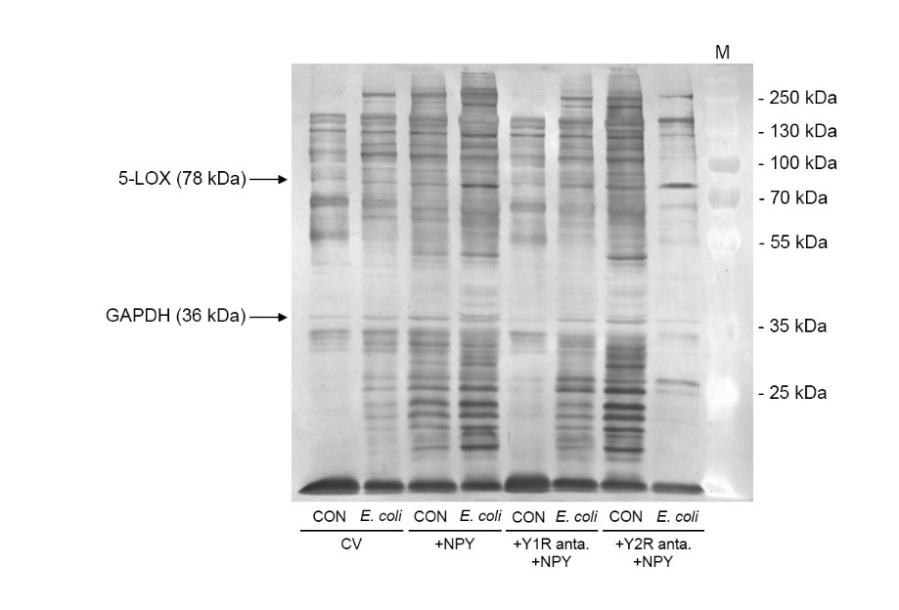


**C**

**B**

**A**

`

**Figure 2.** Representative blots for 5-lipoxygenase (5-LOX, A), leukotriene A4 hydrolase (LTAH, B) and leukotriene C4 synthase (LTCS, C) protein abundancesin the endometrium of gilts from the control (CON) and *E. coli* (*E. coli*) groups, after using neuropeptide Y (NPY) alone or with antagonists of NPY receptor subtype 1 (Y1R) and NPY receptor subtype 2 (Y2R), determined by Western blotting. The density of bands was normalized against glyceraldehyde-3-phosphate dehydrogenase (GAPDH) protein used as loading control. Protein bands corresponded to the molecular weight of 5-LOX, LTAH, LTCS and GAPDH - – 78, 69, 18 and 36 kDa, respectively. marker: M; control value: CV (gained for an endometrial stripes from the CON or *E. coli* groups that had not undergone any treatment *in vitro* conditions); anta.: antagonist.
